# Supplementary material for: Promiscuous Defluorinating Enoyl-CoA Hydratases/Hydrolases Allow for Complete Anaerobic Degradation of 2-Fluorobenzoate
Source: PubMed Central journal article supplement (PMC5742626; doi:10.3389/fmicb.2017.02579), 2017-12-21
Supplement: Data_Sheet_1.pdf [file Data_Sheet_1.pdf]

# **Promiscuous defluorinating enoyl-CoA hydratases/hydrolases allow for complete anaerobic degradation of 2-fluorobenzoate**

**Oliver Tiedt<sup>1</sup>, Mario Mergelsberg<sup>1</sup>, Wolfgang Eisenreich<sup>2</sup>, Matthias Boll<sup>1\*</sup>**

<sup>1</sup>Faculty of Biology – Microbiology, University of Freiburg, Germany

<sup>2</sup>Lehrstuhl für Biochemie, Technische Universität München, Germany

---

**Supplementary data**

**Supplementary Table 1. Primer sequences used to amplify *dch* and *oah* genes from *T. aromatica* or the DNA-region of the plasmid pTrc99a comprising the multiple cloning site (MCS) and *lacI*.** Sequences are depicted from 5'- to 3'-ends. Bold segments represent the regions that are homolog to the corresponding ends of the genes or DNA-regions to be amplified. The reverse primer for *dch* and the forward primer for *oah* contain extensions each encoding an N- or C-terminal His-tag, respectively. Start and stop codons (lower-case characters) are displaced correspondingly.

| <b>gene/<br/>DNA-region</b> | <b>sequence<br/>direction</b> | <b>primer sequence</b>                                        |
|-----------------------------|-------------------------------|---------------------------------------------------------------|
| <i>dch</i>                  | forward                       | CATGAATTCATGAGCGAGGCCAGCTC                                    |
|                             | reverse                       | CATAAGCTtcaGTGATGGTGTGGTGTGACCTGACGAACGGTTCTCCAGTTTGC         |
| <i>oah</i>                  | forward                       | CATGGATCCatgCATCACCATCACCATCACGGTTCGTCAATGAATCCGACTACGCAAAAAC |
|                             | reverse                       | CATAAGCTTCTCCAGCCAGACCTTCAG                                   |
| MCS/ <i>lacI</i>            | forward                       | TCAACCGGTCCATCGAATGGTGCAAAAACC                                |
|                             | reverse                       | TCAATGCATCAAAAAGAGTTTGTAGAAACGC                               |

**Supplementary Table 2. Chemical shifts of expected products of 3-F-BzCoA after reduction by class I BCR.** Positions refer to chemical structures shown by Supplementary Figure 2. The shift values are referenced to external deuterium oxide. Signal multiplicities are indicated in parentheses (s, singlet; d, doublet; t, triplet; m, multiplet; dd, double doublet; td, triplet of doublets; db, doublets of broads; ddd, doublet of doublet of doublets). n.d.: not determined. F-1,5-dienoyl-CoA isomers were distinguished by means of characteristic signals with COSY correlation. These shift values were close to theoretical values. 3-F-1,5-dienoyl-CoA was identified by a discriminating signal at 5.62 ppm coupling to a signal at 5.93 ppm in HH-COSY. This coupling was considered characteristic for the expected double bond at C5-6. The signal at 6.90 ppm was distinctive for the proton at C2 in structure (A) (Supplementary Figure 2). 5-F-1,5-dienoyl-CoA could be distinguished by a triplet signal at 6.69 ppm (H-6) coupled to H-5 at 2.56 ppm. For an additional doublet signal at 5.75 ppm (H-2) only a weak coupling to distant H-4 at 2.40 ppm was observed. Thus, the doublet signal was rather due to coupling to the closer fluorine at C3.

| position | chemical shifts (ppm) |                     |                     |                    |
|----------|-----------------------|---------------------|---------------------|--------------------|
|          | 3-F-1,5-dienoyl-CoA   |                     | 5-F-1,5-dienoyl-CoA |                    |
|          | estimated             | experimental        | estimated           | experimental       |
| 1        | -                     | -                   | -                   | -                  |
| 2        | <b>6.71</b>           | <b>6.90 (db) 1H</b> | <b>6.71</b>         | <b>6.69 (t) 1H</b> |
| 3        | 3.98                  | 3.38 (m)            | <b>2.15</b>         | <b>2.56 (m) 2H</b> |
| 4        | 2.19                  | 1.66 (m) 1H         | <b>2.15</b>         | <b>2.40 (t) 2H</b> |
| 4''      | 2.44                  | 1.82 (m)            | -                   | -                  |
| 5        | <b>5.80</b>           | <b>5.62 (db) 1H</b> | -                   | -                  |
| 6        | <b>5.90</b>           | <b>5.93 (m) 1H</b>  | <b>5.50</b>         | <b>5.75 (d) 1H</b> |
| e1       | 3.13                  | 3.14 (t) 2H         | 3.13                | 3.14 (t) 2H        |
| e2       | 3.87                  | 3.41 (t) 2H         | 3.87                | 3.41 (t) 2H        |
| NH-e3    | 8.01                  | -                   | 8.01                | -                  |
| p1       | -                     | -                   | -                   | -                  |
| p2       | 2.66                  | 2.43 (t) 2H         | 2.66                | 2.43 (t) 2H        |
| p3       | 3.48                  | 3.44 (t) 2H         | 3.48                | 3.44 (t) 2H        |
| NH-p4    | 8.01                  | -                   | 8.01                | -                  |
| p5       | -                     | -                   | -                   | -                  |
| p6       | 4.24                  | 4.02 (s) 1H         | 4.24                | 4.02 (s) 1H        |
| p7       | 4.02                  | -                   | 4.02                | -                  |
| p8       | 0.89                  | 0.77 (s) 3H         | 0.89                | 0.77 (s) 3H        |
| p9       | 0.89                  | 0.91 (s) 3H         | 0.89                | 0.91 (s) 3H        |
| p10      | 4.02                  | 3.85 (dd) 1H        | 4.02                | 3.85 (dd) 1H       |
| p10'     | 3.77                  | 3.56 (dd) 1H        | 3.77                | 3.56 (dd) 1H       |
| 1'       | 6.16                  | 6.07 (d) 1H         | 6.16                | 6.07 (d) 1H        |
| 2'       | 4.75                  | 4.80 (n.d.)         | 4.75                | 4.80 (n.d.) n.d.   |
| 3'       | 3.85                  | n.d.                | 3.85                | n.d.               |
| 4'       | 4.40                  | 4.57 (s) 1H         | 4.40                | 4.57 (s) 1H        |
| 5'       | 4.28                  | 4.25 (s) 2H         | 4.28                | 4.25 (s) 2H        |
| a2       | 8.58                  | 8.11 (s) 1H         | 8.58                | 8.11 (s) 1H        |
| a4       | -                     | -                   | -                   | -                  |
| a5       | -                     | -                   | -                   | -                  |
| a6       | -                     | -                   | -                   | -                  |
| a8       | 8.35                  | 8.49 (s) 1H         | 8.35                | 8.49 (s) 1H        |

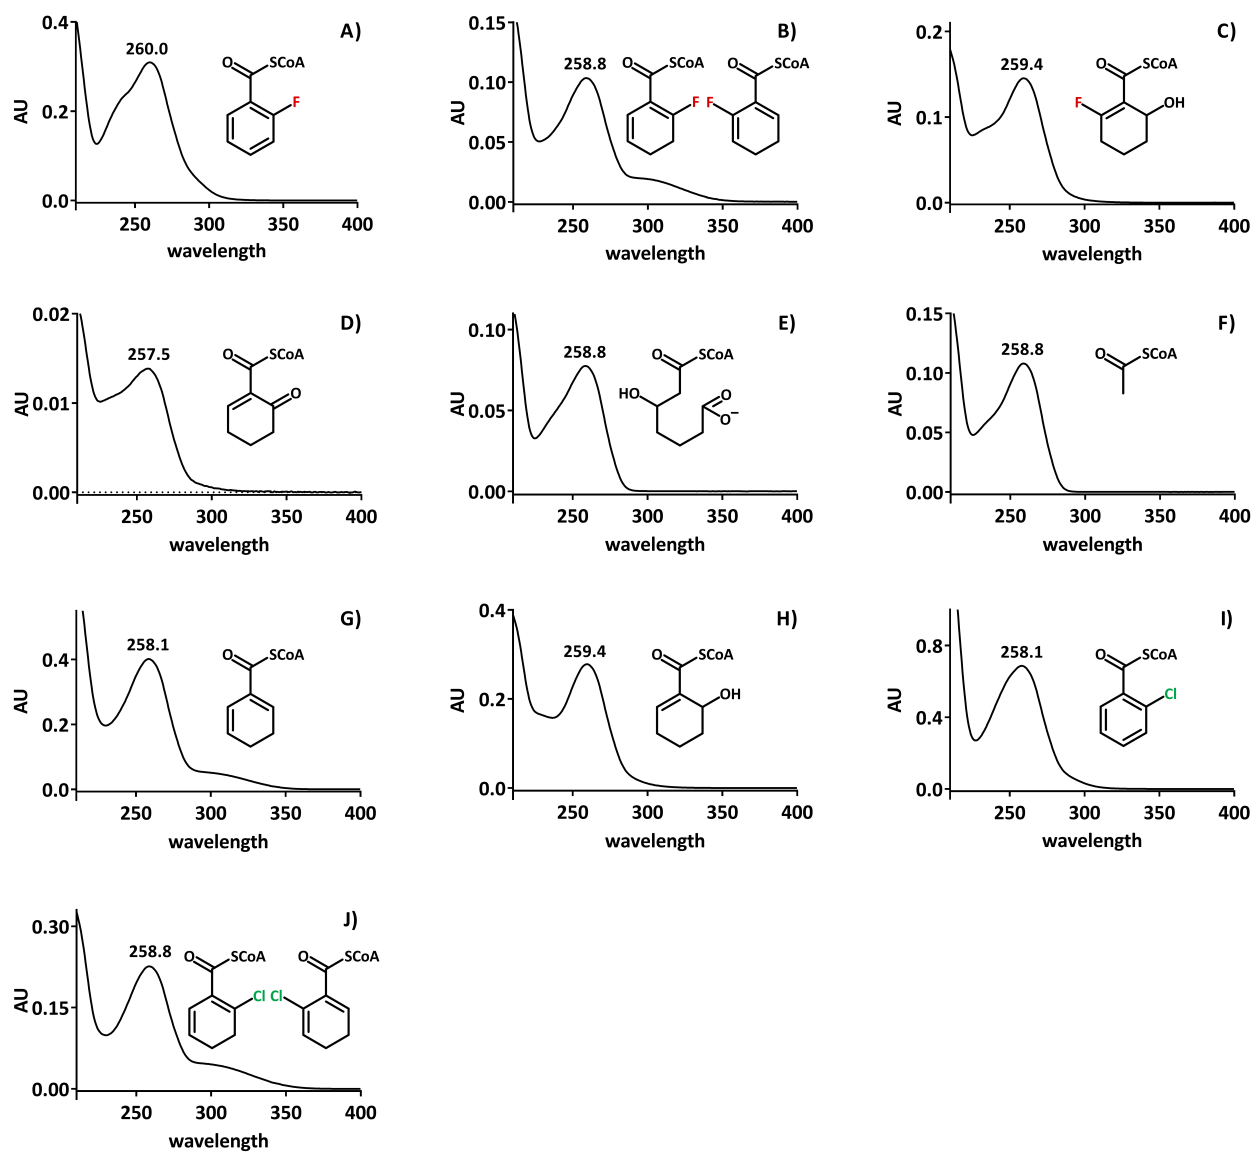

**Supplementary Figure 1. UV/vis spectra of reaction products observed by UPLC analyses.** Absorption maxima are indicated for (A) 2-F-BzCoA, (B) 2-F-/6-F-1,5-dienoyl-CoA, (C) 2-F-6-OH-1-enoyl-CoA, (D) 6-oxo-1-enoyl-CoA, (E) 3-OH-pimeloyl-CoA, (F) acetyl-CoA, (G) 1,5-dienoyl-CoA, (H) 6-OH-1-enoyl-CoA, (I) 2-Cl-BzCoA, (J) Cl-1,5-dienoyl-CoA.



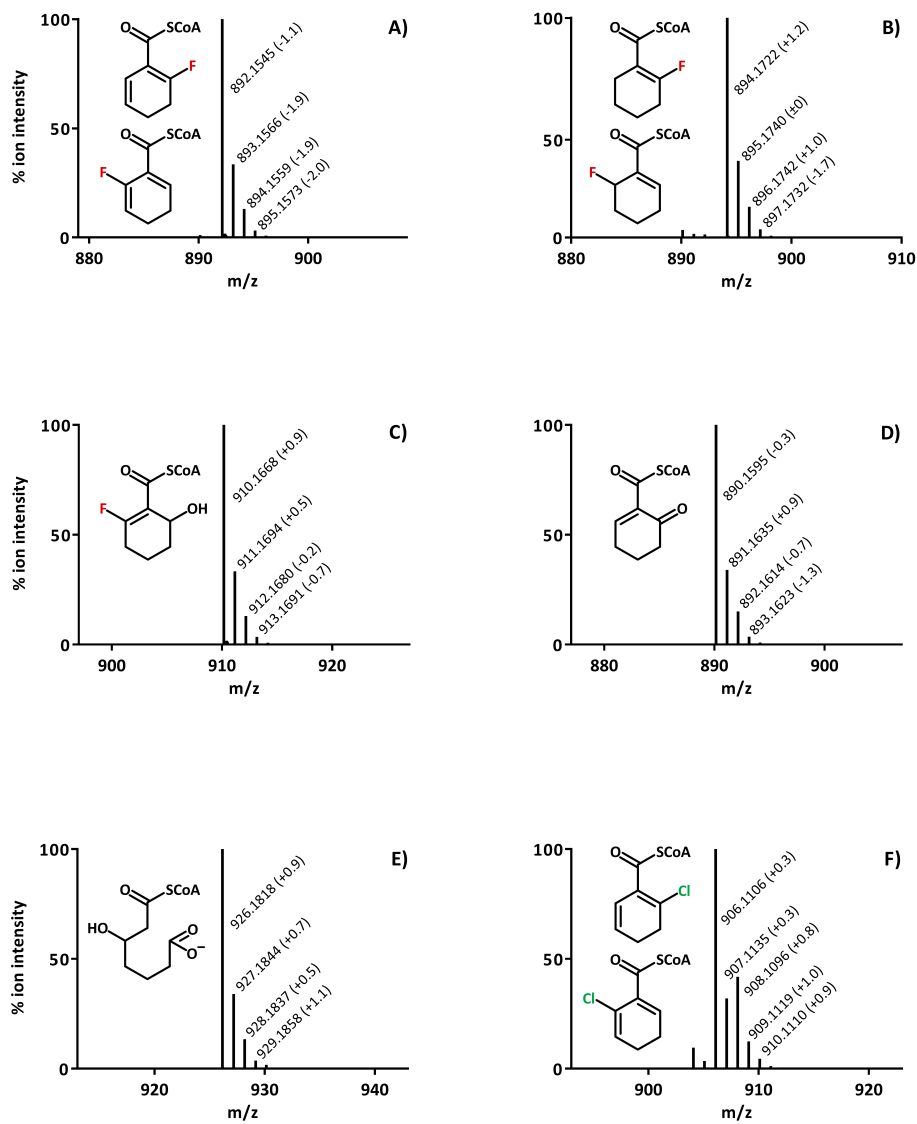

**Supplementary Figure 3. Mass spectra of reaction products identified by ESI/Q-TOF-MS analyses. (A) 2-F-6-F-1,5-dienoyl-CoA, (B) 2-F-6-F-1-enoyl-CoA, (C) 2-F-6-OH-1-enoyl-CoA, (D) 6-oxo-1-enoyl-CoA, (E) 3-OH-pimeloyl-CoA, (F) Cl-1,5-dienoyl-CoA. For each isotopic composition experimental m/z-values of the  $[M+H]^+$  ions are given with ppm deviations from the theoretical values in parentheses.**

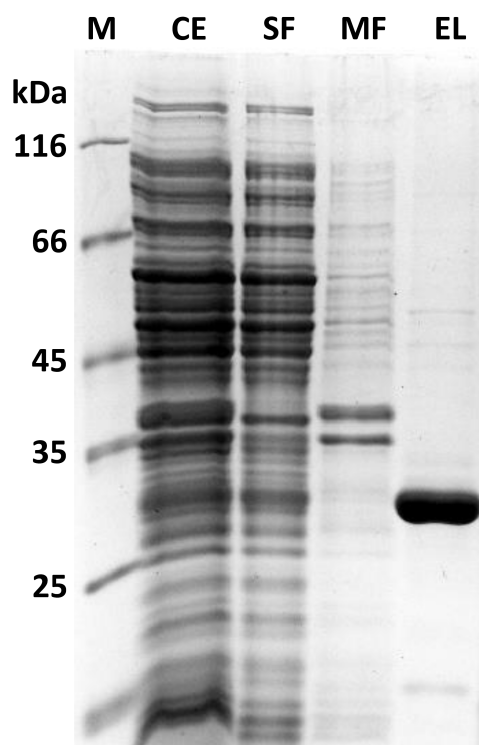

**Supplementary Figure 4. SDS PAGE of heterologously produced DCH enriched by Ni-affinity chromatography.** Different protein fractions obtained during the enrichment process were analyzed. Lanes are labeled correspondingly: M = protein MW marker, CE = crude extract, SF = soluble fraction (150,000×g supernatant), MF = membrane fraction (150,000×g pellet), EL = elution fraction (250 mM imidazole), with recombinant DCH (29.3 kDa) as the predominant protein component.

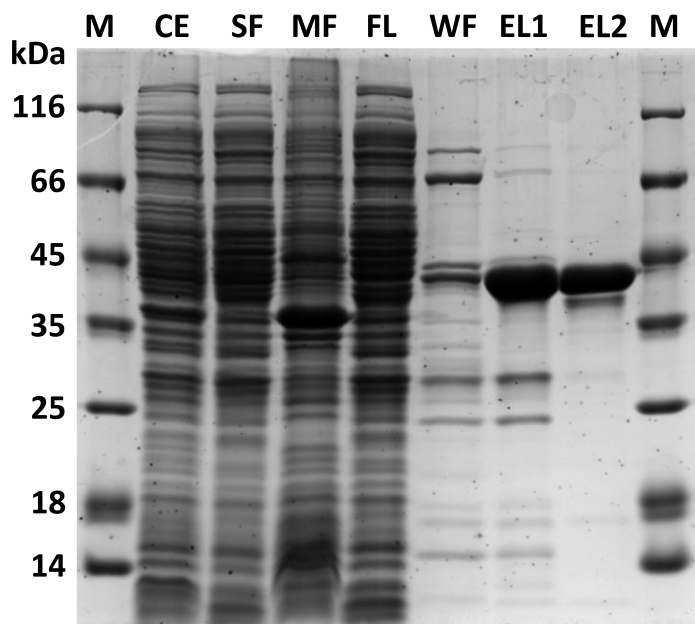

**Supplementary Figure 5. SDS PAGE of heterologously produced OAH enriched by Ni-affinity chromatography.** Different protein fractions obtained during the enrichment process were analyzed. Lanes are labeled correspondingly: M = protein MW marker, CE = crude extract, SF = soluble fraction (150,000×g supernatant), MF = membrane fraction (150,000×g pellet), FL and WF = flow through and wash fraction (60 mM imidazole), respectively, of affinity chromatography; EL1 and EL2 = elution fractions (120 and 250 mM imidazole) containing recombinant OAH (43.8 kDa) as the predominant protein component. EL1 and EL2 were pooled.

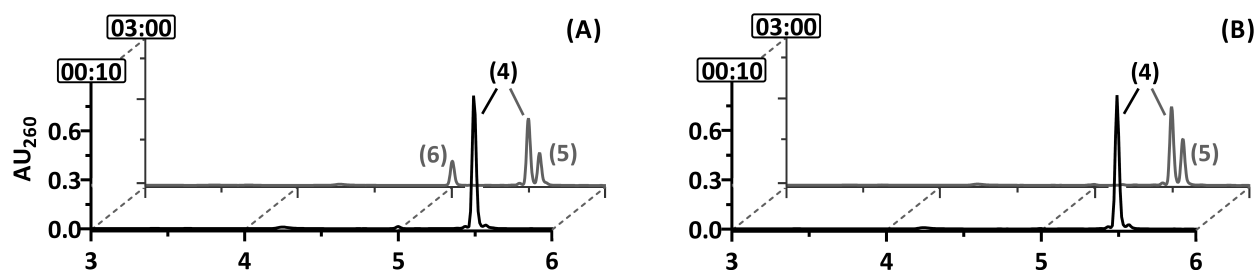

**Supplementary Figure 6. UPLC diagrams demonstrating the time-dependent conversion of BzCoA by (A) BCR+DCH and (B) BCR+OAH.** UPLC analyses of samples are shown that were taken at representative time points as indicated by the numbers (min) at the y-axis. Peaks of CoA thioester compounds are numbered as follows: BzCoA (4), 1,5-dienoyl-CoA (5), 6-OH-1-enoyl-CoA (6).
